# Supplementary material
Source: publisher figshare collection journal article supplement (https://acs.figshare.com/ndownloader/files/3789424)
Supplement: Supplementary file 1 [file 3789424]

***Supporting Information for:***

**Novel porous polymorphs of zinc cyanide with rich thermal and mechanical behavior**

Fabien Trouselet,<sup>1</sup> Anne Boutin,<sup>1, \*</sup> and François-Xavier Coudert<sup>2, †</sup>

<sup>1</sup>*École Normale Supérieure, PSL Research University, Département de Chimie,  
Sorbonne Universités – UPMC Univ Paris 06, CNRS UMR 8640 PASTEUR, 24 rue Lhomond, 75005 Paris, France*

<sup>2</sup>*PSL Research University, Chimie ParisTech – CNRS, Institut de Recherche de Chimie Paris, 75005 Paris, France*

## Complement to Section V.A

The distributions of radial distances  $g(r_{\text{Zn-C/N}})$ , shown in Fig. S5, allow to distinguish different types of transitions. For either dense or porous structures, the first two peaks (labeled 1 and 2 on the Figure, at  $\approx 2$  and  $\approx 3.1$  Å respectively) are associated to the cyanide ions coordinating the zinc, and show very little evolution under pressure. For the *dia-c* structure, a third (very broad) peak at distances  $r \leq 5.0$  Å is also visible; it corresponds to the distances between a given Zn, in one of the interpenetrated *dia* frameworks, and the nearest cyanide ions from the other framework. With increasing pressure, this peak shifts significantly to shorter distances (from 4.9 at zero pressure to 4.4 Å at  $P = 2.0$  GPa) and simultaneously broadens. This shift is reminiscent of the experimental observation by Collings et al. that, in the high-pressure phase of  $\text{Zn}(\text{CN})_2$ , the corresponding distances (shown in Fig. 9 of Ref.1) decrease with increasing pressure, with a tendency towards 6-fold coordination of Zn at very large pressures. Our approach fails to describe reliably the high-pressure phase, but we suspect that both features are indeed connected and propose the following mechanism: an increase in pressure tends to amplify the *buckling vibrations* (or  $\langle \theta^2 \rangle$ ) of a cyanide ion around its Zn–Zn axis. While such vibrations have little impact on the positions of peaks 1 and 2 in  $g_{\text{Zn-C/N}}(r)$  (at order 2 only in  $\theta$ ), they impact much more the distances corresponding to the 3rd peak (at order 1 in  $\theta$ ), accounting for its broadening and shift towards smaller distances. The latter shift is favored by (a combined effect of van der Waals interactions and) compression. The distributions of Zn–C/N radial distances  $r'$  evaluated on time-averaged atomic positions — see Fig. S5(c) where the third peak seems to be converted for  $P > 1.2$  GPa into a very broad feature — indicate that this transition is accompanied by a substantial increase of disorder in the relative atomic positions of distinct frameworks.

This effect should also happen in the *mok* phase where  $g_r(\text{Zn-C/N})$  presents also a broad peak, of similar nature, around 5 Å, but not in the porous phases where such a peak is absent (see Fig. S5-(a)). This may explain the fact that pressure-induced transitions are of different nature in porous structures (at lower pressures, and with a clear discontinuity in volume). The suspected driving mechanism for these transitions is rather a mode softening, that can be evidenced by the evolution of elastic constants.

---

\* Email: anne.boutin@ens.fr

† Email: fx.coudert@chimie-paritech.fr. Twitter: @fxcoudert. Web: <http://coudert.name/>

<sup>1</sup> I. Collings et al., *J. Am. Chem. Soc.* **135**, 7610(2013).

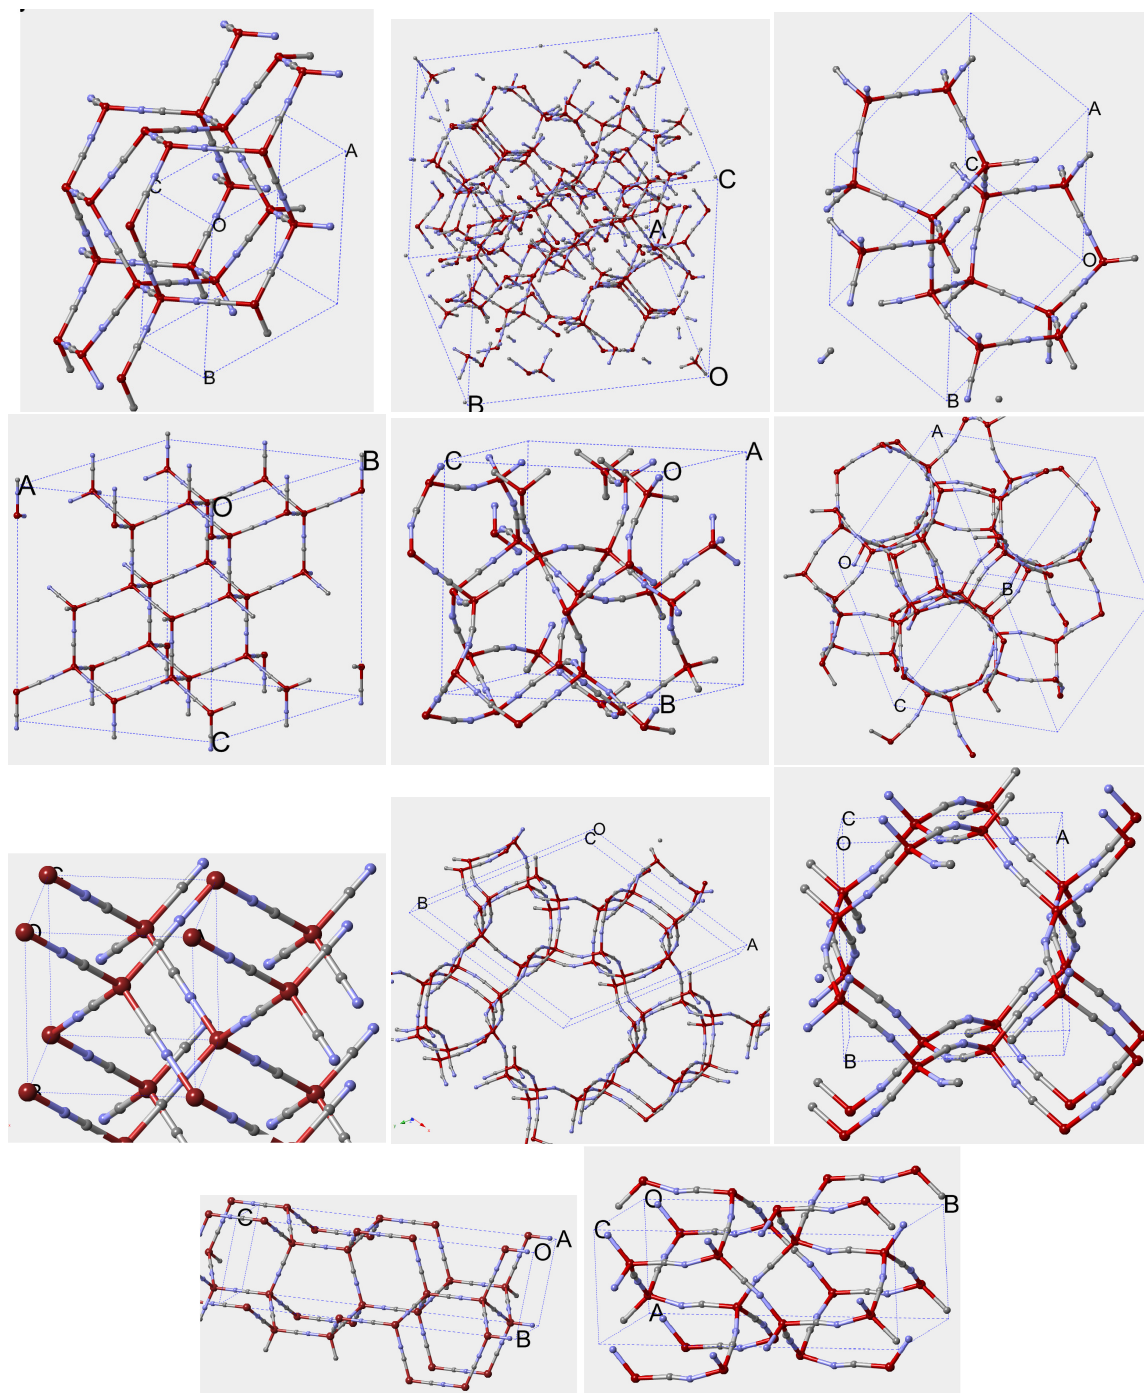

Figure S1. The eleven  $T = 0\text{ K}$  structures of  $\text{Zn}(\text{CN})_2$  studied in this work, as obtained from energy-minimization. Unit cells are indicated, and a bit more than 1 unit cell is shown to better give account of the structure's topology. Color code: Zn in red, C in grey, N in blue. Top line, from left to right: *lon*, *che*, *unj*; Second line: *dia*, *gsi*, *lcs*; Third line: *dia-c*, *una*, *unc*; Last line: *cfc*, *mok*.

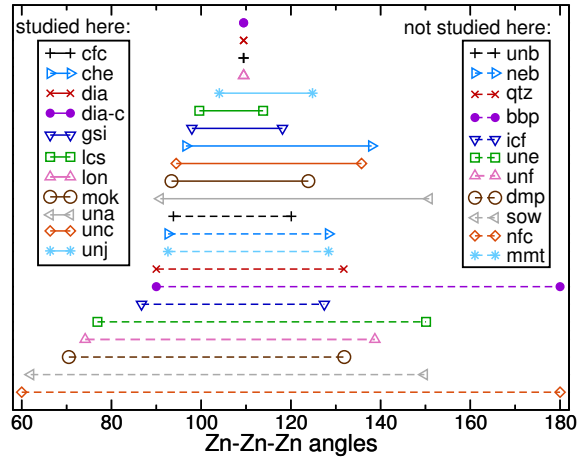

Figure S2. Minimal and maximal values of Zn–Zn–Zn angles in (i) the nets considered in this study (11 uppermost points/continuous lines) and (ii) other 4-coordinated nets found in the RCSR database, but not considered in the study.

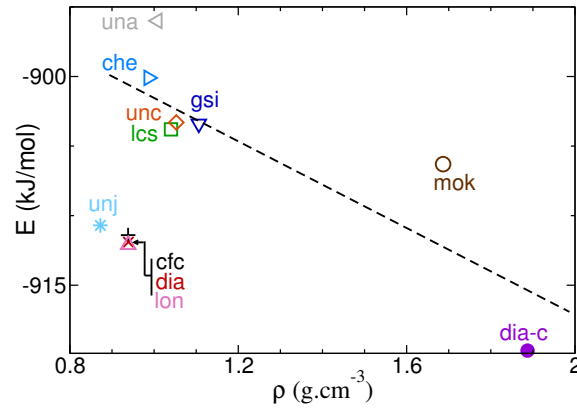

Figure S3. Energy of zinc cyanide polymorphs (per  $\text{Zn}(\text{CN})_2$  unit) versus density. For each polymorph, the structure was obtained by re-optimizing, with the MD force field (and near-zero Kelvin dynamics), the corresponding structure found by DFT.

| Framework | $\alpha_a$ | $\alpha_b$ | $\alpha_c$ | $\alpha_V$ |
|-----------|------------|------------|------------|------------|
| cfc       | -12.62     | -12.74     | -12.58     | -37.94     |
| che       | -13.50     | -13.54     | -13.37     | -40.41     |
| dia       | -13.13     | -13.15     | -12.65     | -38.93     |
| dia-c     | -11.86     | -12.18     | -11.82     | -35.86     |
| gsi       | -13.28     | -13.31     | -13.54     | -40.13     |
| lcs       | -14.90     | -14.90     | -14.82     | -44.62     |

| Framework | $\alpha_a$ | $\alpha_b$ | $\alpha_c$ | $\alpha_V$ |
|-----------|------------|------------|------------|------------|
| lon       | -12.92     | -12.79     | -12.68     | -38.39     |
| mok       | -8.29      | 14.01      | -5.71      | 0.01       |
| una       | -13.70     | -13.60     | -14.28     | -41.58     |
| unc       | -14.36     | -14.20     | -14.93     | -43.49     |
| unj       | -12.21     | -12.22     | -11.72     | -36.15     |

Table S1. Table giving, for each  $\text{Zn}(\text{CN})_2$  framework listed, the linear thermal expansion coefficients  $\alpha_i = \frac{1}{l_i} \left( \frac{dl_i}{dT} \right)$ , with  $l_i = a, b, c$  the cell parameters; additionally the volume thermal expansion coefficient  $\alpha_V = \frac{1}{V} \left( \frac{dV}{dT} \right)$  is also given. Values are in  $\text{MK}^{-1}$ . Note that, apart from the *mok* case, for a given framework the 3 linear expansion coefficients differ from each other by 5 percent at most.

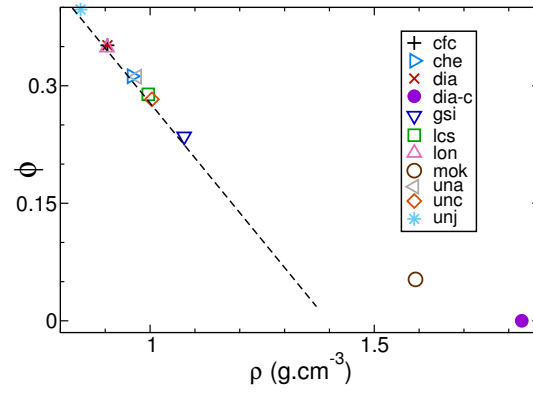

Figure S4. Porosity  $\phi$  as a function of density  $\rho$  for the structures listed, at  $T = 0$  K and  $P = 0$ .

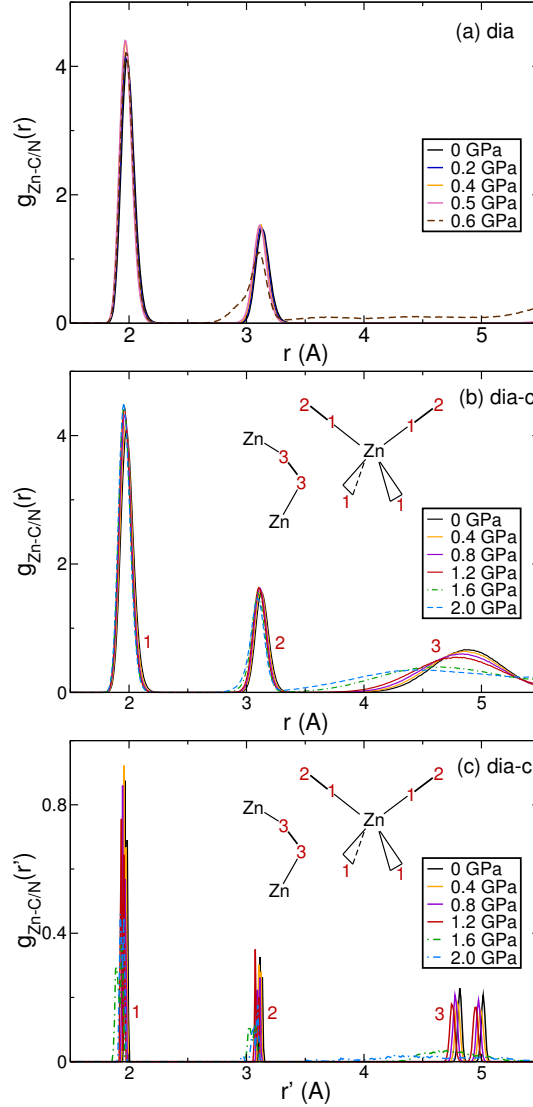

Figure S5. Distributions of Zn-X distances  $r$  (in ångströms) between a Zn atom and other types of atoms ( $X=C$  or  $N$ ), for the *dia* (a) and *dia-c* (b) structures, at  $T = 300$  K and pressures  $P$  indicated in the legend. For the *dia-c*, peaks refer to the type of C/N atoms, as indicated in the cartoon (1: nearest atom of a cyanide coordinating the Zn atom; 2: other atom of such a cyanide; 3: atoms of a further neighbor cyanide, not coordinating this Zn). (c): distributions of distances  $r'$  of the same type as in (b), but evaluated on time-averaged structures.

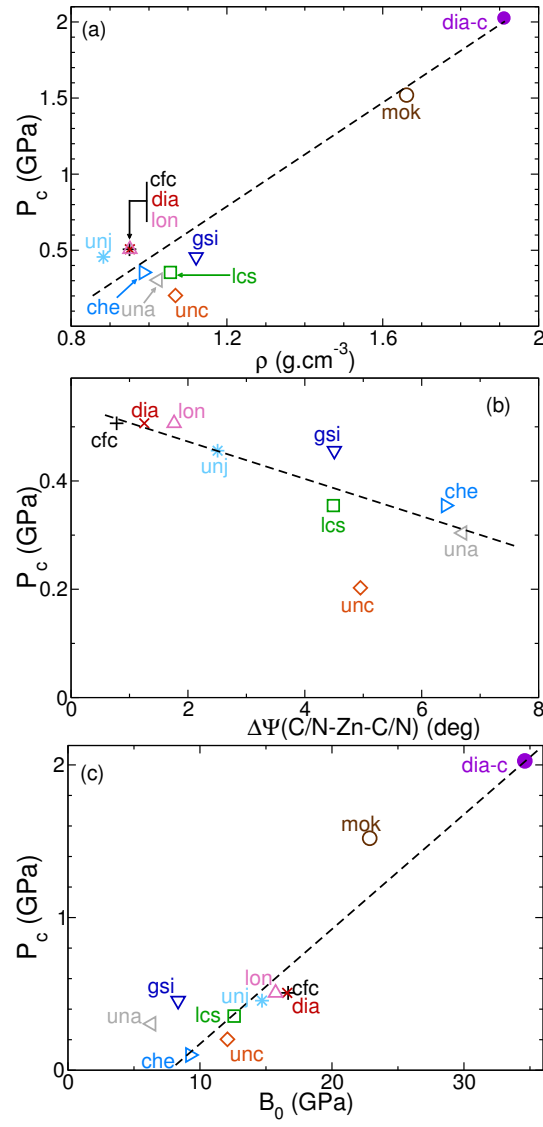

Figure S6. Plots showing the critical pressure  $P_c$  (in GPa, estimated from MD simulations at  $T = 300$  K) versus (a) the framework density (estimated in MD at the same temperature and zero pressure); (b) the root mean square deviation  $\Delta\Psi$  of C/N–Zn–C/N angles (in degrees, estimated from  $T = 0$  K structures); or (c) the bulk modulus  $B_0$  at (in GPa, estimated from MD simulations at  $T = 300$  K).

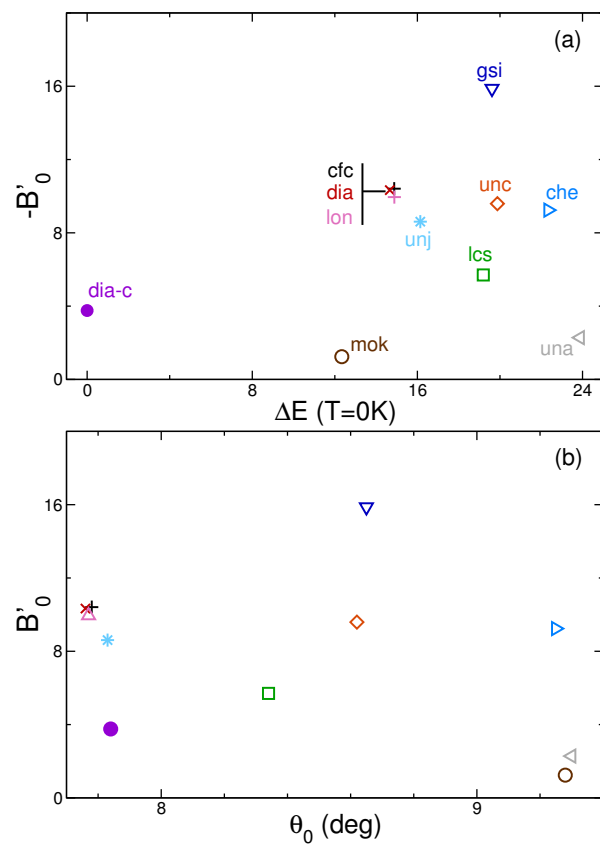

Figure S7. Coefficients  $B'_0$  estimated from MD simulations at  $T = 300K$  and subsequent fits to Eq. (4) in the paper, for the 11 structures indicated; they are plotted against (a) the DFT-obtained energy  $\Delta E(T = 0K)$  (in kJ/mol); and (b) the angle  $\theta_0$  (in degrees).

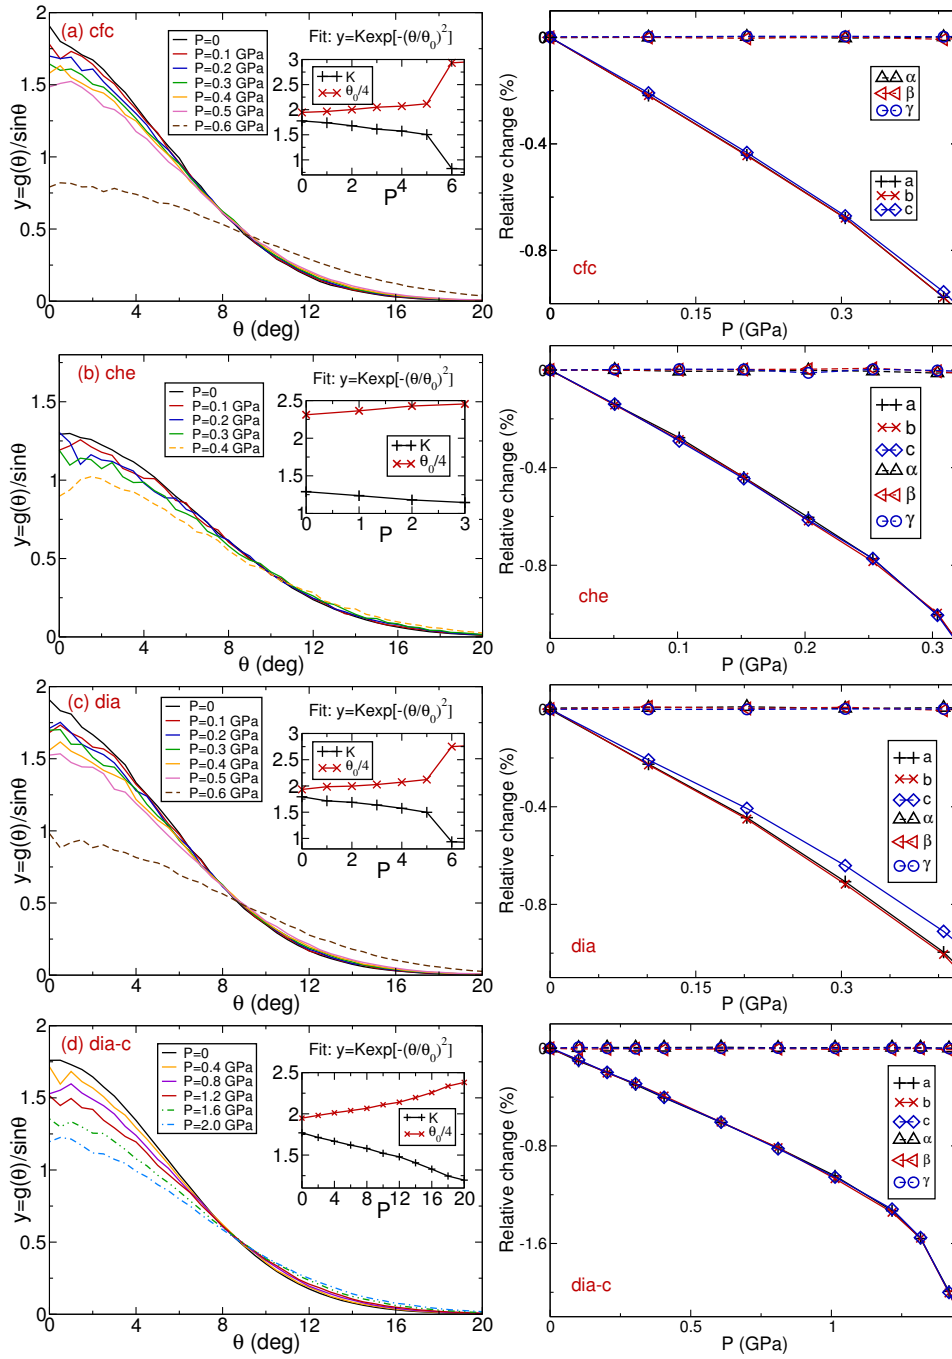

Figure S8. Evolution of structures (a) *cfc*, (b) *che*, (c) *dia*, and (d) *dia-c* under pressure, at  $T = 300$  K (in MD simulations of stepwise compression). Left: functions  $g(\theta)/\sin(\theta)$  with  $g(\theta)$  the distribution of angle  $\theta$  (see inset in Fig. 4 of the main text) at pressures indicated in the captions. Right: Relative evolution of cell parameters  $a$ ,  $b$ ,  $c$  and cell angles  $\alpha$ ,  $\beta$ ,  $\gamma$  versus pressure.



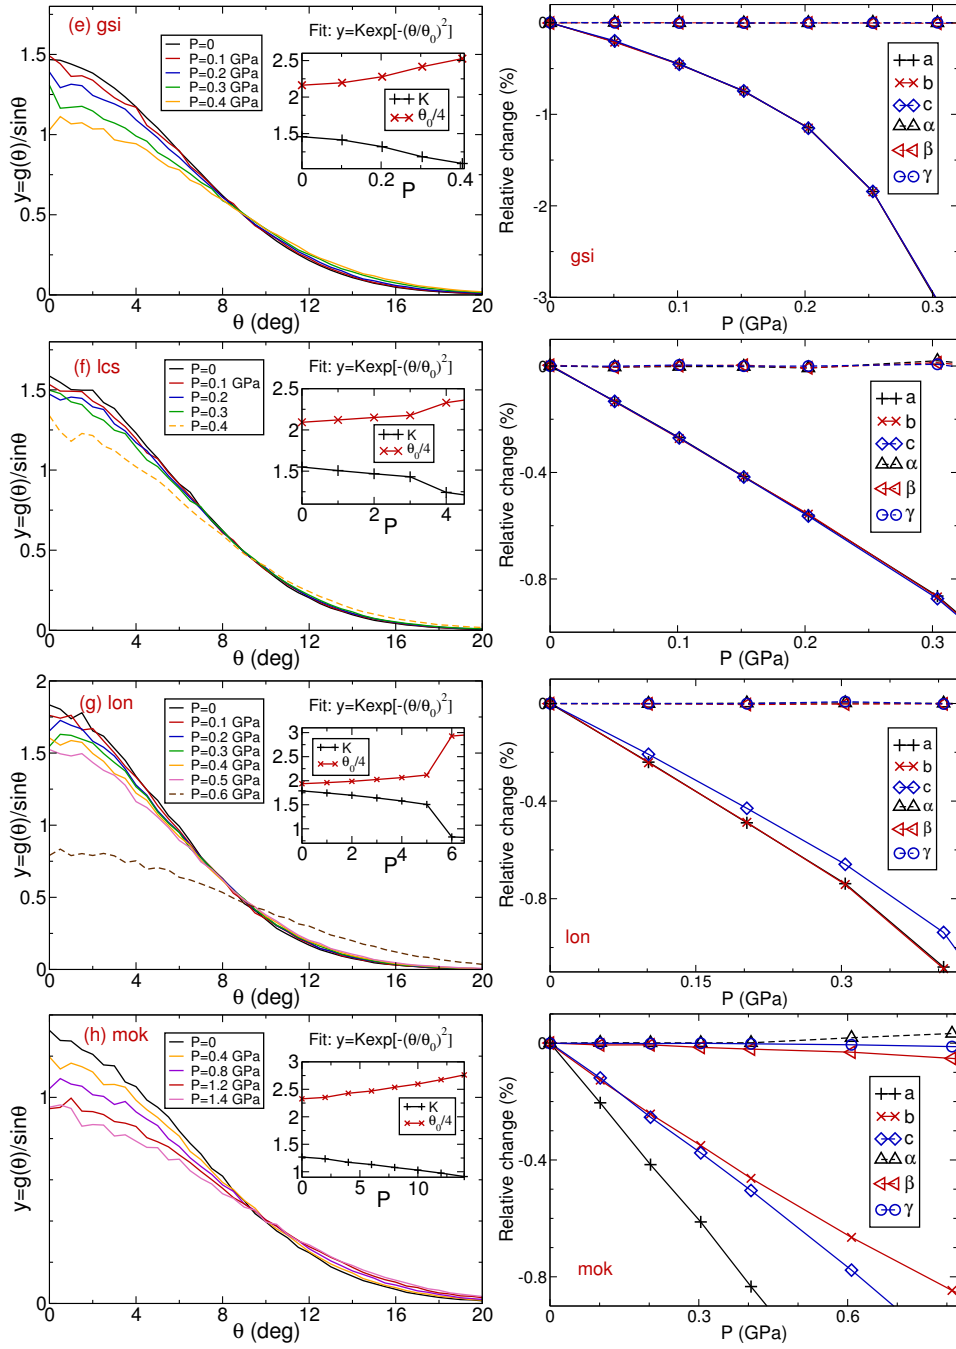

Figure S9. Similar content as in Fig. S8, but for the following structures: (e) *gsi*, (f) *lcs*, (g) *lon*, and (h) *mok*.

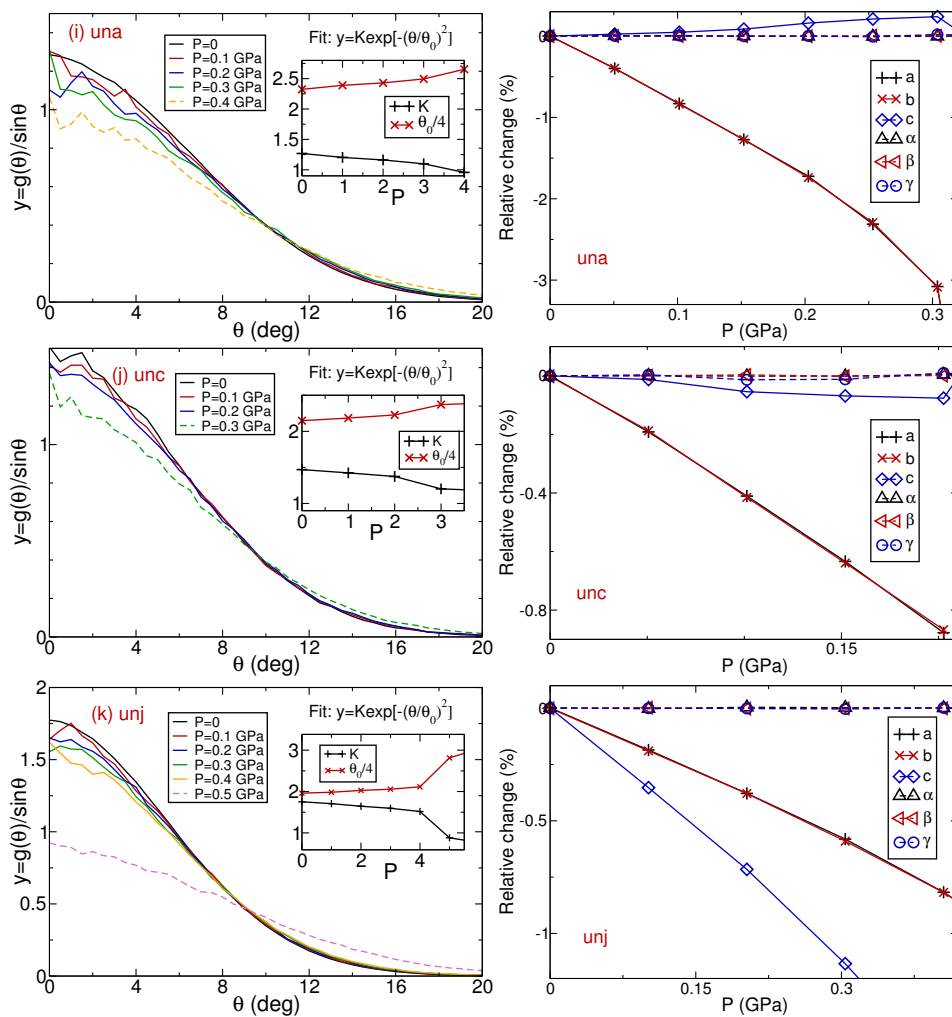

Figure S10. Similar content as in Fig. S8, but for the following structures: (i) *una*, (j) *unc*, and (k) *unj*.
